# Supplementary material
Source: publisher figshare collection journal article supplement (https://gsajournals.figshare.com/ndownloader/files/14601851)
Supplement: Supplementary file 1 [file 14601851]

## Sheet: Sheet2
Table S1 Nanopore sequencing summary
Sample	Total Reads	Total Basepairs	Average Read Length	Average Read Coverage
DGRP732_run1	375699	2705318235	7201	19.1
DGRP732_run2	539219	5723208595	10614	40.4
DGRP379_run1	643507	6221847004	9669	46.5
DGRP732 control (PCR)	316263	2343754337	7411	16.6
